# Supplementary material for: Transcription controls growth, cell kinetics and cholesterol supply to sustain ACTH responses
Source: PubMed Central journal article supplement — Endocr Connect. 2017 Jul 18;6(7):446–57. doi: 10.1530/EC-17-0092 (PMC5574282; doi:10.1530/ec-17-0092), 2017-07-18
Supplement: ec-6-446-s004.pdf [file ec-6-446-s004.pdf]

| Gene             | Control   |           |           |           | ACTH       |            |            |            | Fold Downregulated | P-value  |
|------------------|-----------|-----------|-----------|-----------|------------|------------|------------|------------|--------------------|----------|
| <i>C2</i>        | Red       | Red       | Red       | Red       | Light Blue | White      | Dark Blue  | Light Blue | $2.51 \pm 0.11$    | < 0.0001 |
| <i>Clu</i>       | Red       | Red       | Red       | Red       | Dark Blue  | Dark Blue  | Light Blue | Light Blue | $3.09 \pm 0.21$    | < 0.0001 |
| <i>Casp12</i>    | Light Red | Light Red | Light Red | Light Red | Light Blue | Light Blue | Dark Blue  | Light Blue | $3.85 \pm 0.41$    | < 0.0002 |
| <i>H2-Aa</i>     | Red       | Red       | Red       | Red       | Dark Blue  | White      | Dark Blue  | Dark Blue  | $14.73 \pm 1.81$   | < 0.0001 |
| <i>H2-Ab1</i>    | Red       | Red       | Red       | Red       | Dark Blue  | White      | Dark Blue  | Dark Blue  | $14.43 \pm 1.39$   | < 0.0001 |
| <i>H2-Eb1</i>    | Red       | Red       | Red       | Red       | Dark Blue  | White      | Dark Blue  | Dark Blue  | $16.73 \pm 0.1.33$ | < 0.0001 |
| <i>H2-Dhb1</i>   | Red       | Red       | Red       | Red       | Dark Blue  | White      | Dark Blue  | Dark Blue  | $4.86 \pm 0.39$    | < 0.0001 |
| <i>Clr</i>       | Light Red | Light Red | Light Red | Light Red | Light Blue | White      | Light Blue | Light Blue | $3.61 \pm 0.52$    | < 0.0002 |
| <i>Ii (cd74)</i> | Light Red | Light Red | Light Red | Light Red | Light Blue | White      | Dark Blue  | Light Blue | $11.07 \pm 1.06$   | < 0.0001 |
| <i>Tsc22d1</i>   | Light Red | Light Red | Light Red | Light Red | Light Blue | Light Blue | Light Blue | Light Blue | $2.27 \pm 0.26$    | < 0.01   |
| <i>Itga6</i>     | Light Red | Light Red | Light Red | Light Red | Light Blue | Light Blue | Light Blue | Light Blue | $2.09 \pm 0.08$    | < 0.0001 |
| <i>Cd72</i>      | Light Red | Light Red | Light Red | Light Red | Light Blue | Light Blue | Dark Blue  | Light Blue | $2.5 \pm 0.25$     | < 0.001  |
| <i>Akr1c</i>     | Light Red | Light Red | Light Red | Light Red | Dark Blue  | Light Blue | Dark Blue  | Dark Blue  | $3.22 \pm 0.5$     | < 0.01   |
| <i>Eya1</i>      | Light Red | Light Red | Light Red | Light Red | Dark Blue  | Dark Blue  | Light Blue | Dark Blue  | $3.02 \pm 0.25$    | < 0.0001 |
| <i>Pcolce</i>    | Light Red | Light Red | Light Red | Light Red | Dark Blue  | Light Blue | Dark Blue  | Dark Blue  | $2.27 \pm 0.17$    | < 0.0003 |
