# Supplementary figures and images for: Transcription controls growth, cell kinetics and cholesterol supply to sustain ACTH responses
Source: PubMed Central journal article supplement — Endocr Connect. 2017 Jul 18;6(7):446–57. doi: 10.1530/EC-17-0092 (PMC5574282; doi:10.1530/ec-17-0092), 2017-07-18

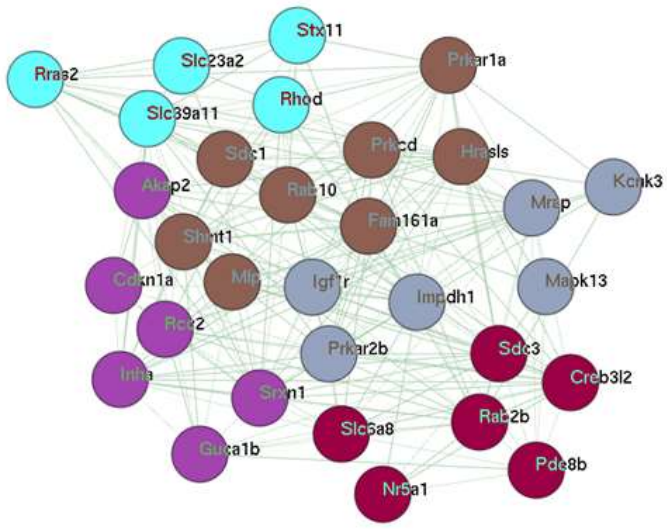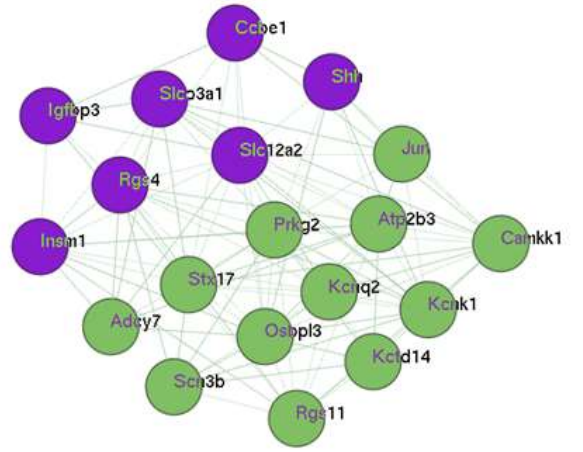

Supplement: ec-6-446-s001.pdf [file ec-6-446-s001.pdf]

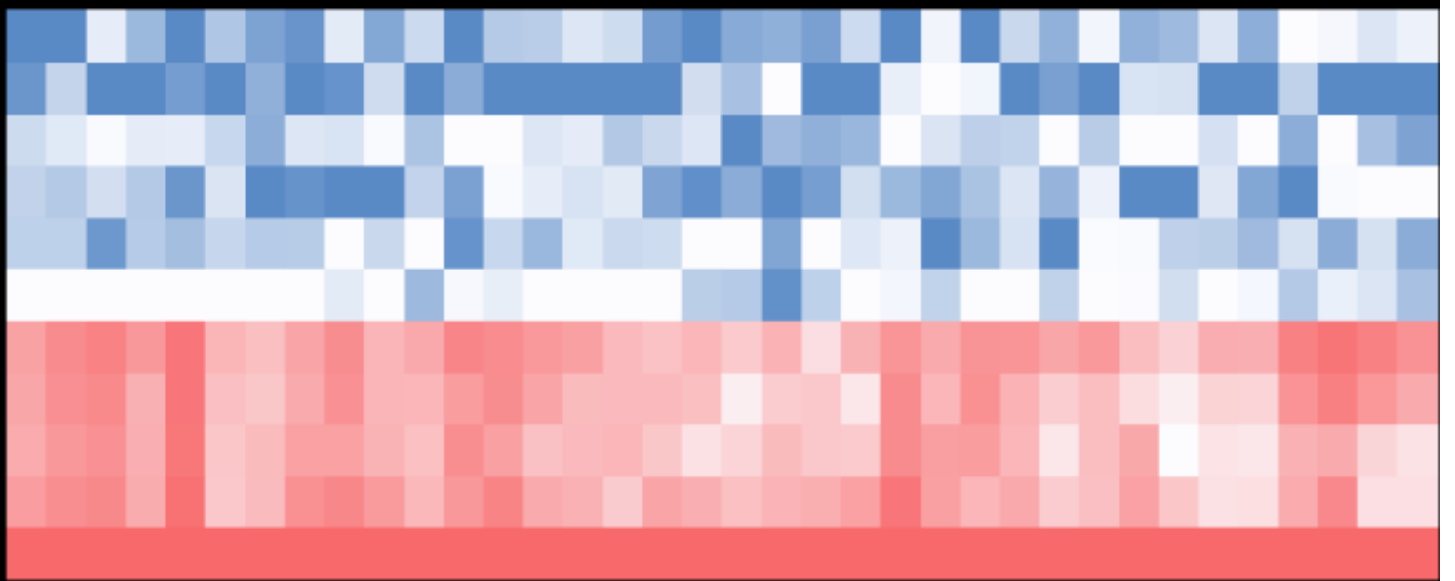

Supplement: ec-6-446-s002.pdf [file ec-6-446-s002.pdf]

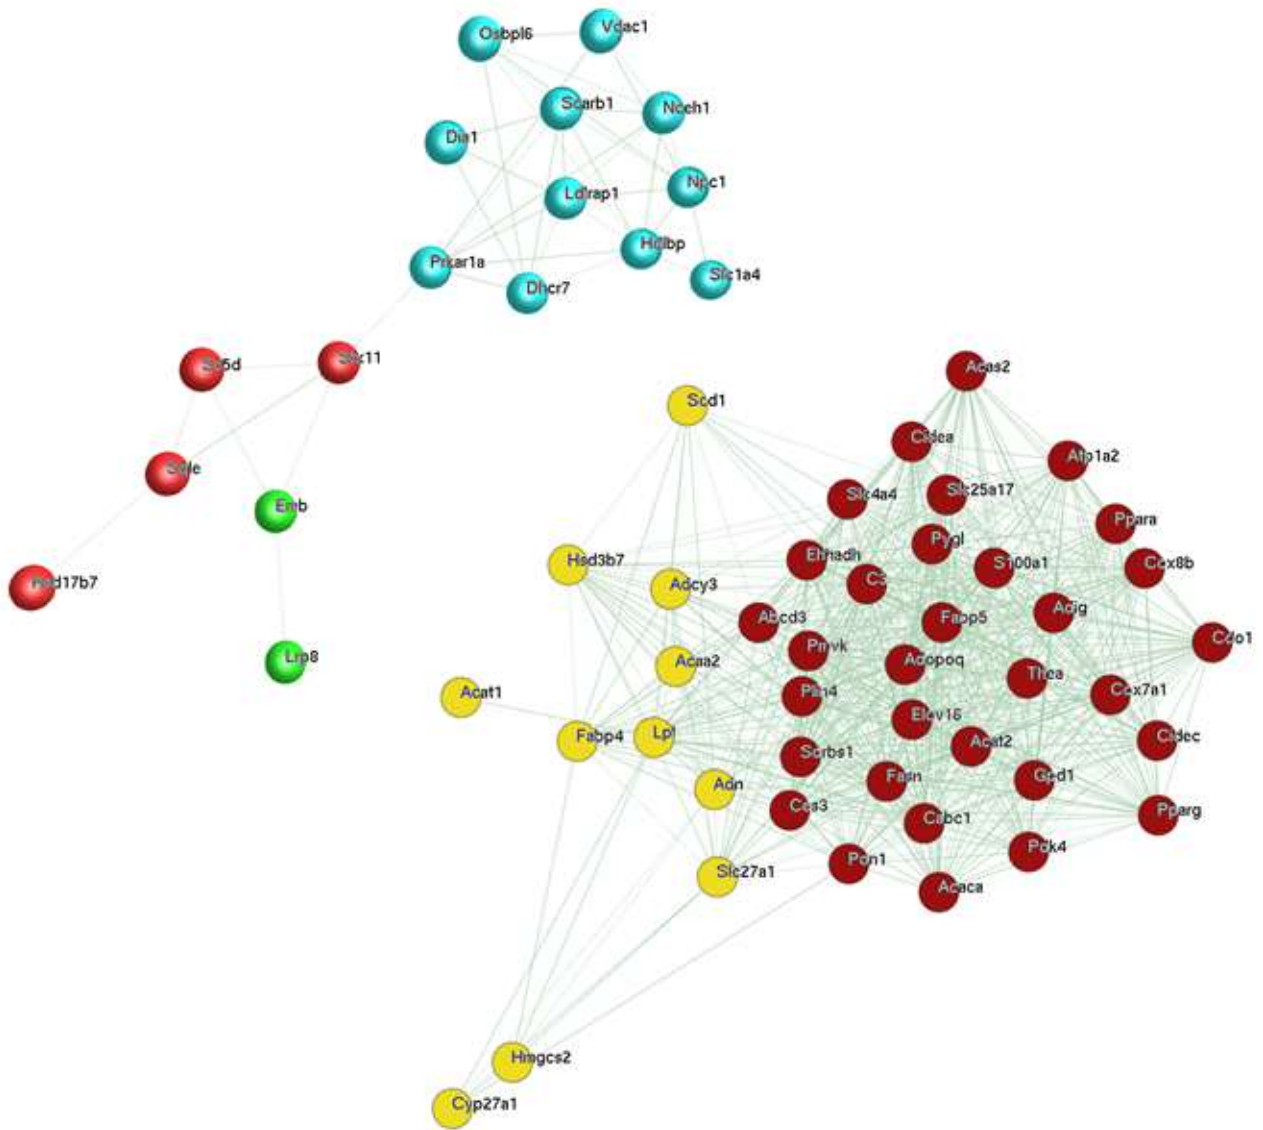

Supplement: ec-6-446-s003.pdf [file ec-6-446-s003.pdf]

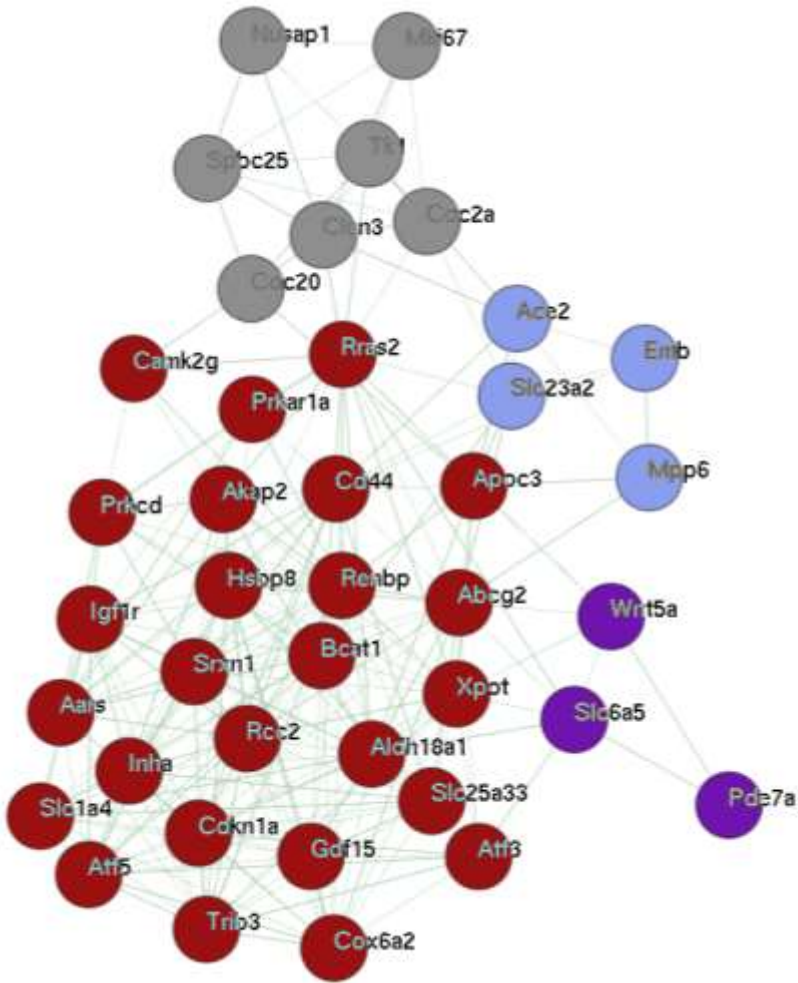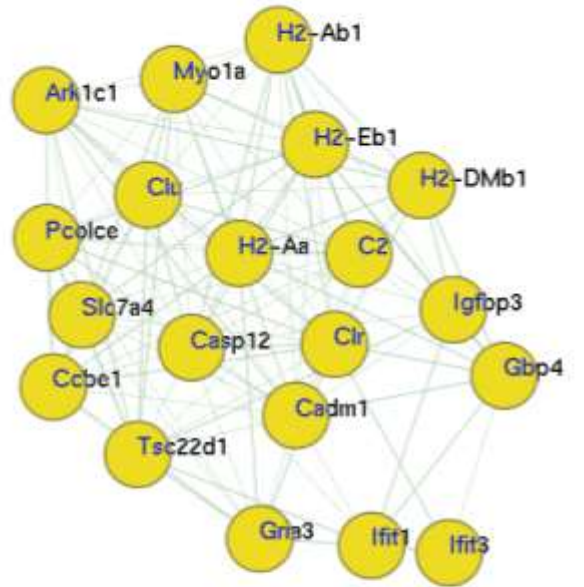

Supplement: ec-6-446-s005.pdf [file ec-6-446-s005.pdf]
